# Supplementary material for: Critical Windows of Exposure to Air pollution and Gestational Diabetes: Assessing Effect Modification by Maternal Pre-Existing Conditions and Environmental Factors
Source: Research Square preprint supplement (doi:10.21203/rs.3.rs-2231800/v1), 2022-11-05

| Variable | Mean | Std. Dev | Median | Lower Quartile | Upper Quartile | Range | IQR |
| --- | --- | --- | --- | --- | --- | --- | --- |
| ALE | 1.12 | 3.77 | 0.35 | -0.62 | 1.52 | 45.32 | 2.14 |
| PM2.5, µg/m3 | 8.03 | 1.66 | 8.01 | 6.39 | 9.09 | 14.50 | 2.70 |
| NO2, ppb | 12.35 | 5.73 | 11.59 | 7.08 | 17.10 | 55.71 | 10.02 |
| O3, ppb | 48.49 | 4.93 | 48.39 | 44.99 | 51.99 | 69.39 | 7.00 |
| NDVI | 0.69 | 0.078 | 0.70 | 0.65 | 0.74 | 0.91 | 0.09 |
| GVI | 13.95 | 8.44 | 12.15 | 7.95 | 18.03 | 93.19 | 10.08 |
| Ambient temperature, °C | 8.30 | 2.97 | 8.32 | 6.24 | 10.57 | 31.96 | 4.33 |

**Supplementary Table 1.** Descriptive statistics of environmental factors.

Note: Std. Dev: Standard deviation; IQR: Interquartile range

|  | **GVI** | **ALE** | **NDVI** | **PM2.5** | **NO2** | **O3** | **Temp.** |
| --- | --- | --- | --- | --- | --- | --- | --- |
| **GVI** | 1.00 | -0.05 | 0.14 | 0.07 | -0.05 | 0.02 | 0.01 |
| **ALE** | -0.05 | 1.00 | -0.27 | 0.18 | 0.41 | -0.20 | 0.07 |
| **NDVI** | 0.14 | -0.27 | 1.00 | -0.18 | -0.26 | 0.04 | -0.01 |
| **PM2.5** | 0.07 | 0.18 | -0.18 | 1.00 | 0.44 | 0.25 | 0.25 |
| **NO2** | -0.05 | 0.41 | -0.26 | 0.44 | 1.00 | -0.27 | -0.01 |
| **O3** | 0.02 | -0.20 | 0.04 | 0.25 | -0.27 | 1.00 | 0.21 |
| **Temp.** | 0.01 | 0.07 | -0.01 | 0.25 | -0.01 | 0.21 | 1.00 |

**Supplementary Table 2.** Coefficient of correlation between continuous variables of interest.

**Supplementary Table 3.** Adjusted* mediating effects of exposures to air pollution (PM2.5, NO2 and O3) on the associations between the environmental exposures of interest and gestational diabetes.

| Exposures | HR (95% CI) |
| --- | --- |
| GVI |  |
| Natural direct effect | 0.95 (0.93–0.98) |
| Natural indirect effect | 0.99 (0.98–0.99) |
| Total effect | 0.94 (0.92–0.96) |
| % of effect explained by mediator (95% CI) | 20.1 (17.6–22.6) |
|  |  |
| NDVI |  |
| Natural direct effect | 0.92 (0.89–0.95) |
| Natural indirect effect | 1.00 (0.99–1.01) |
| Total effect | 0.92 (0.89–0.95) |
| % of effect explained by mediator (95% CI) | 1.4 (1.9–4.7) |
|  |  |
| ALE |  |
| Natural direct effect | 0.98 (0.97–0.99) |
| Natural indirect effect | 1.00 (1.00–1.00) |
| Total effect | 0.98 (0.97–0.99) |
| % of effect explained by mediator (95% CI) | 4.6 (3.6–5.6) |

*Adjusted for maternal age, parity, maternal smoking status, prepregnancy body mass index, weekly ambient temperatures, month of birth, year of birth, residing in the Greater Toronto Area, community size, deprivation quintiles, instability quintiles, dependency quintiles and ethnic quintiles.

**Supplementary Figure 1.** Directed acyclic graph for estimating the direct effect of residential of air pollution on gestational diabetes. Parameters in red are potential confounding factors and parameters in grey are unmeasured variables. Green line: causal path. According to the DAG, the minimal sufficient adjustment for estimating the total effect of air pollution exposure on gestational diabetes is: maternal age, parity, maternal smoking status, prepregnancy body mass index, weekly ambient temperatures, month of birth, year of birth, residing in the Greater Toronto Area, community size, deprivation quintiles, instability quintiles, dependency quintiles and ethnic quintiles.


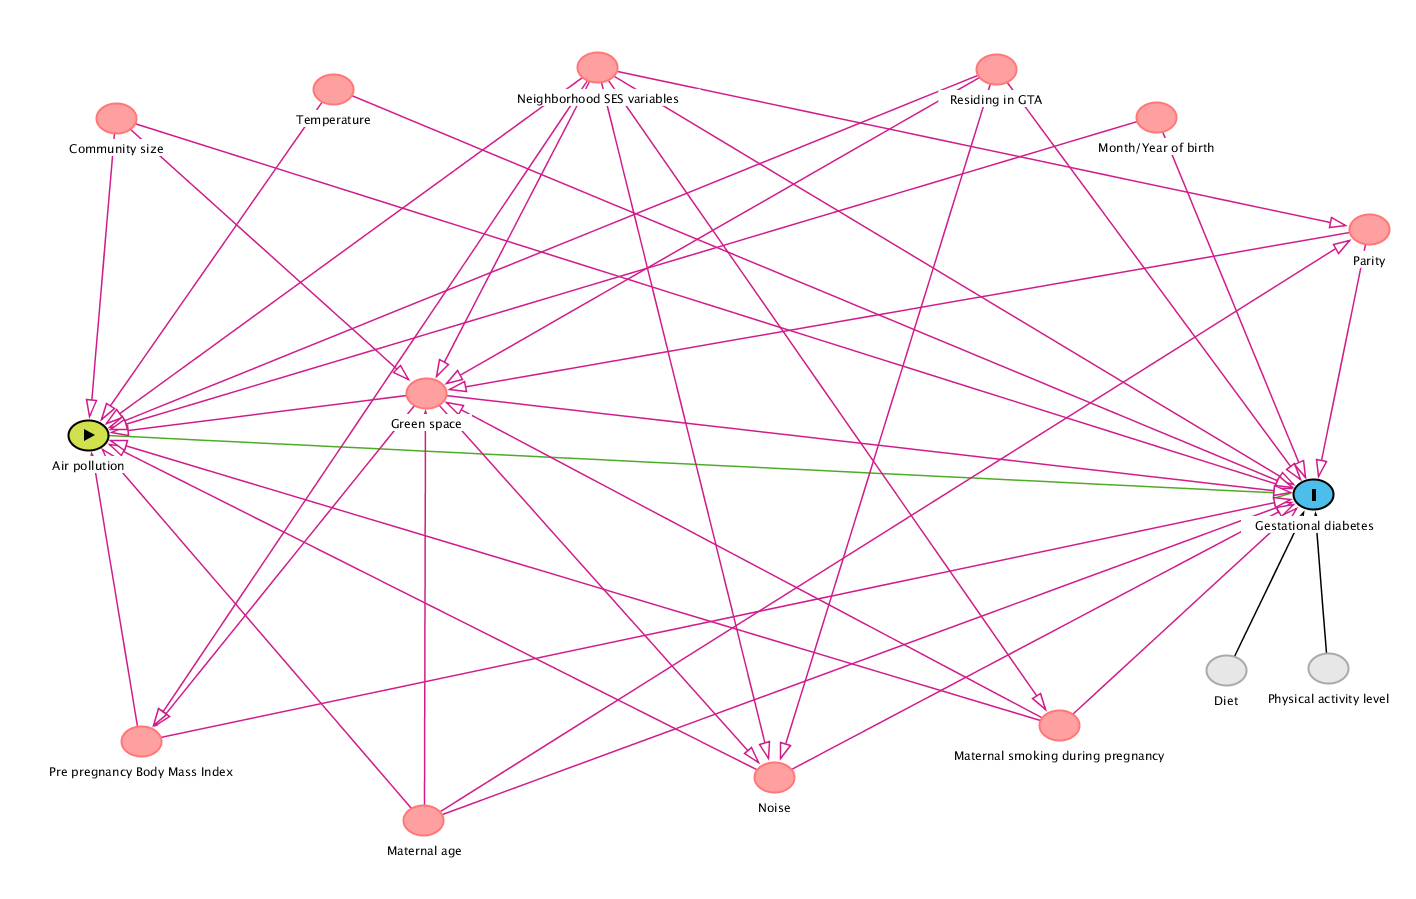

Supplement: Supplementary file 1 [file 53b92ca0529b6f5f9a3b97de.docx]
